# Supplementary material for: An In Silico Analysis of Malaria Pre-Erythrocytic-Stage Antigens Interpreting Worldwide Genetic Data to Suggest Vaccine Candidate Variants and Epitopes
Source: MDPI journal article supplement (doi:10.3390/microorganisms10061090), 2022-05-25
Supplement: s1 [file s1]

**Analyses of major malaria pre-erythrocytic stage antigens using worldwide isolates identify vaccine candidate variants and epitopes.**

### **Supplemental Information**

Amed Ouattara<sup>1\*</sup>, Dwivedi Ankit<sup>2</sup>, Matthew Adams<sup>1</sup>, Amadou Niangaly<sup>3</sup>, Matthew B. Laurens<sup>1</sup>, Myaing M. Nyunt<sup>4</sup>, Christopher V. Plowe<sup>3</sup>, Abdoulaye Djimde<sup>3</sup>, Shannon Takala-Harrison<sup>1</sup>, Joana C. Silva<sup>2</sup>

#### **Author affiliation**

<sup>1</sup>Malaria Research Program, Center for Vaccine Development and Global Health, University of Maryland School of Medicine, 685 West Baltimore St., Baltimore, MD 21201, USA

<sup>2</sup>Institute for Genome Sciences, University of Maryland School of Medicine, 670 West Baltimore St., Baltimore, MD, 21201, USA

<sup>3</sup>Malaria Research and Training Center, University of Sciences, Techniques and Technologies of Bamako, P.O. Box: 1805, Bamako, Mali

<sup>4</sup>Duke Global Health Institute, Duke University, NC 27708

\*Corresponding author

#### **Email addresses:**

AO: [amouattara@som.umaryland.edu](mailto:amouattara@som.umaryland.edu); AD: [ADwivedi@som.umaryland.edu](mailto:ADwivedi@som.umaryland.edu); MA: [madams@som.umaryland.edu](mailto:madams@som.umaryland.edu); AN: [niangaly@icermali.org](mailto:niangaly@icermali.org); MBL:

[mlaurens@som.umaryland.edu](mailto:mlaurens@som.umaryland.edu); MM: [myaing.nyunt@duke.edu](mailto:myaing.nyunt@duke.edu); CVP:

[chris.plowe@duke.edu](mailto:chris.plowe@duke.edu); AD: [adjimde@icermali.org](mailto:adjimde@icermali.org); STH: [stakala@som.umaryland.edu](mailto:stakala@som.umaryland.edu);

JCS: [jcsilva@som.umaryland.edu](mailto:jcsilva@som.umaryland.edu)

## A. Figures

**Supplemental Figure S1. Linear sequences of epitope fragments.** All individual epitopes have been concatenated into a single fragment and polymorphic residues are highlighted in yellow.

### - P36

EYIDKTNDVDIIATFNLICIKCKEPLLDKPMTNDKSYHLERIRREARKEGYITFTGFNF

### - UIS3

LKKGIEDDLYYNKYLEYNNIKYRHVNMMEYMVQGLQENNMY

### - UIS4

VNDSEELD DKDKDE

### - CELTOS

FRGNHSEQLESQVLPTVKKHAKSENLVAEPGA KVSDE

### - CSP

ALYQCYGS

SSTLNERSNKHKLKQPADGNPDNDPNEWSPCTCGNGIQVRIKPGSANKPKDEKKICKMEVN

### - SAP1

RHVMFLRDDMNFEMNEQGKTHNLDIQSYMPYDQQKGENQEPSYLNKKEDVKIPKTKSCED  
NQYLIISELVNYHYCFYITDLCKKLSSVKYFNKPISILGNEQIQNGYQKLTSNHQMNQKILCDK  
NKKCDIPQKCDNTQDDENSEQNQNNSNGKIQHIDNSDHHIDPHLNEPSSNDVPKIQKHYS

SIINVQKDISTQPTDDNNTAYLNRVLSHDILNEIQEIHPDILISNLVQELKQHDIRTTYNDNAI  
TAPFNIQQTQTDNKKDEYDKKNNVKNKHYNKAGNKFSSVQIDTQMDNPDKNNDIYNSIINKSQ  
DGTCTNFLQNSLWKHFQILSIYKKEKCDQAKPYSENTDVLCRWTPSYICCNALNNYHYFTSTL  
CPQQTFKFTYDYKNK

- LSA1

VNVSRIRKREDLEDLEQEEEEEDLEEGEEDLEEQEEEEEDLEEKEKQGQHSDEREHQSDEREHQSS  
LQDNRGNVEGRRKKIKPEQKEDDILETVNISDVDDDEFDNQDNDNDKSLYDYI

- LSA3

SDKLEGQLVKSTVLDKVENLLTMSIIVIGETTEVIKDDNAKLKELKLSSEDSKEIIDIEADILKEL  
VLKGGRLVDKKEVDKEVSKASKPFISTFSLIAEKK

- P52

VILNNEFSTTAKTHNCPSRAPTPNFYSNMDIDFSCLCYGDQDKVNIPSKRDLHAYNDVLGI  
NCFKKVIIPDPSCCKREFVGTMIINMDYDHDRTIRTRTFWQNLL

- SPECT2

RSNCNSENDMDMLASFskHPLGEAILMLEGIANDLSTLQPVNGWIRKENACTLHVTCVIGLPP  
YPIGLPPYIPKTTAYKNAVELPAVFTGLDKESPSDVYNKSNLWMKFIINVSFSAGGSVDMNEQ  
LIVIGGNDSDIISPHDTDTKNSAPPQDTALKGYNIEVEAGSNSCTSKQSSNKYDTSYLY  
MECGDQPESTSTYPNYSILLGFGISSGVYSTPCIPGMKSCSLNMSYIYVLALDGYSDGELVGTC  
LDGLTGFKVEFHEKCAKSLKACGSAK

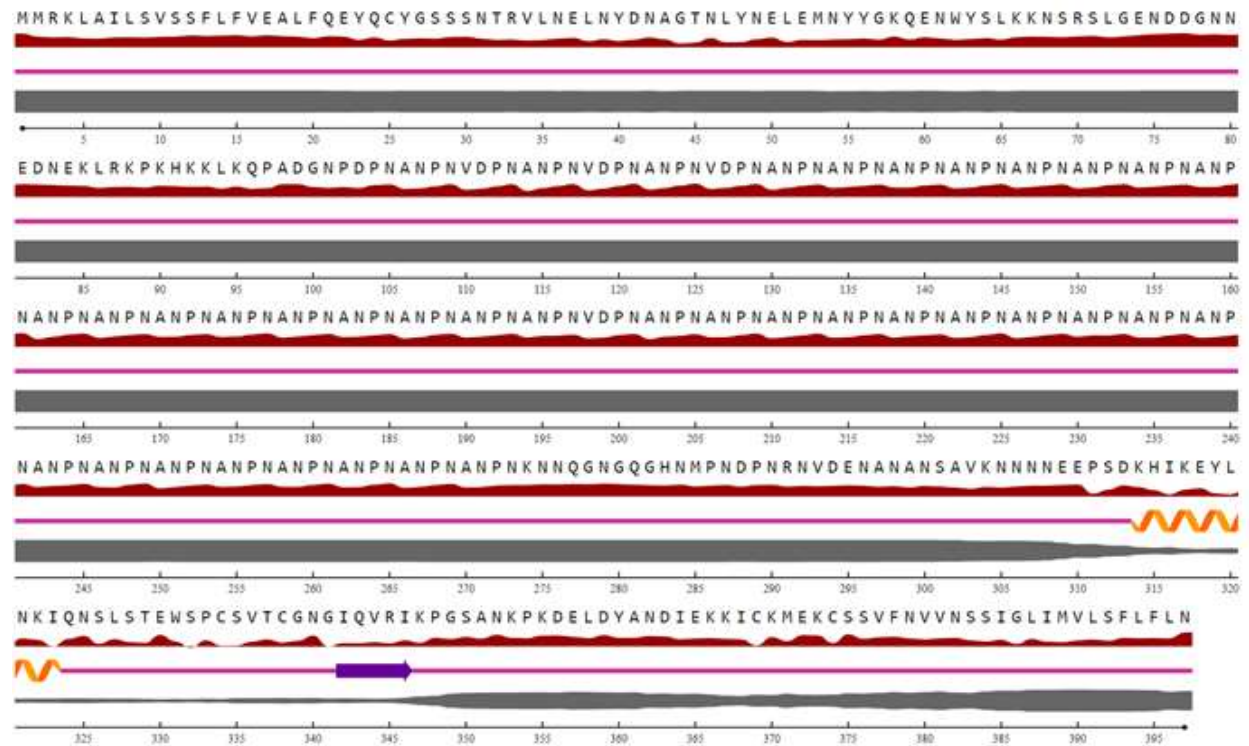

## LSA1

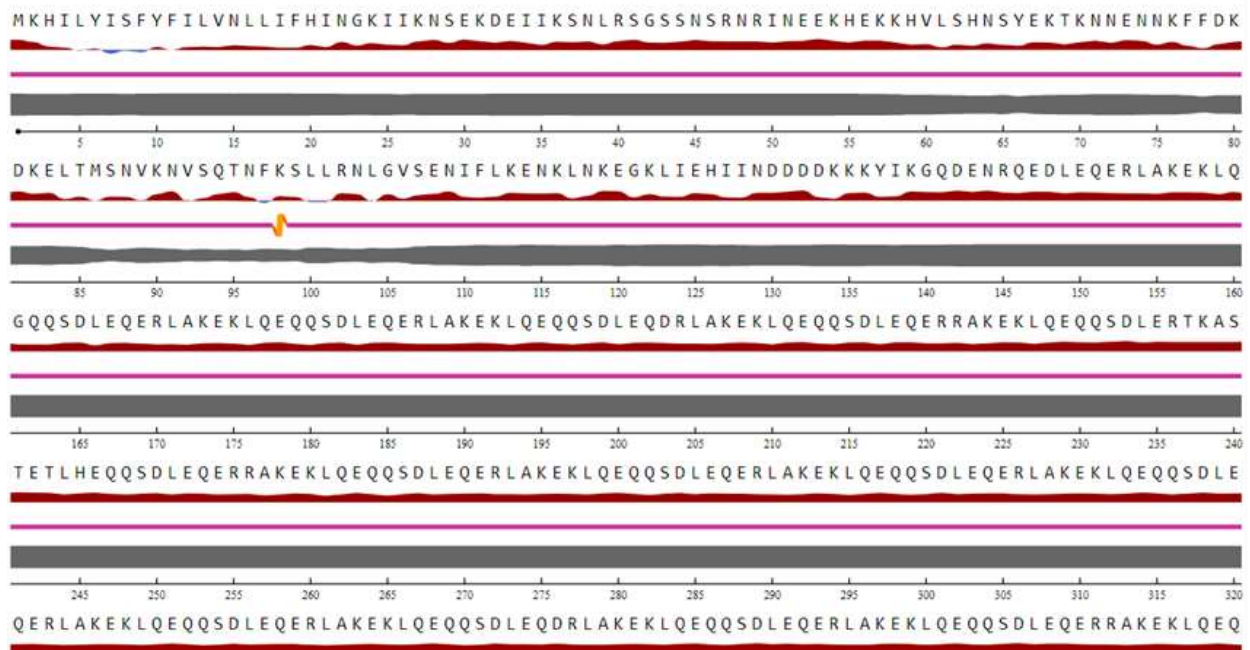

## LSA 3

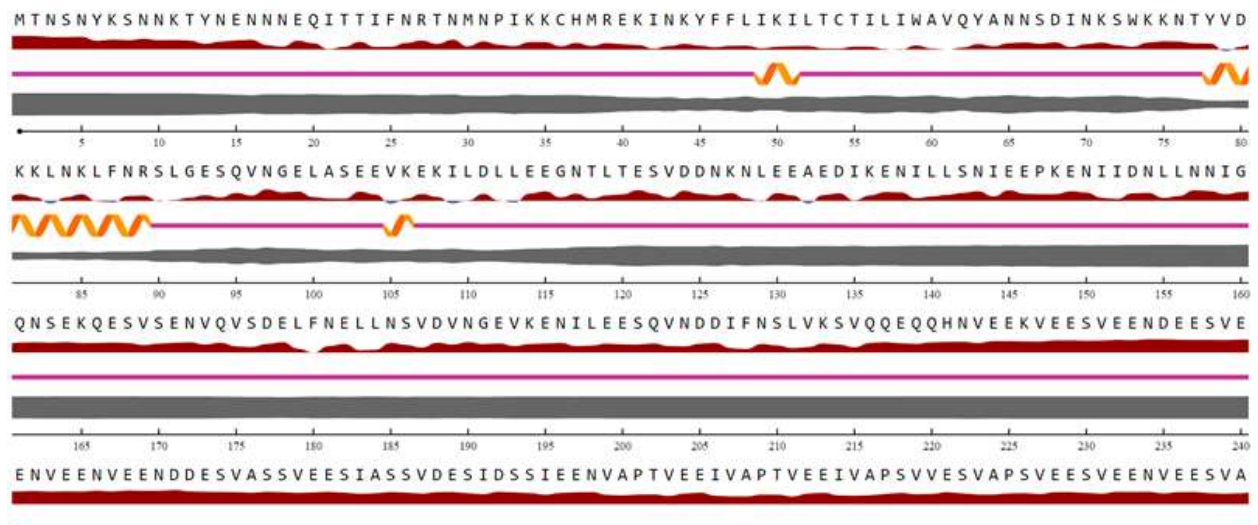

P52

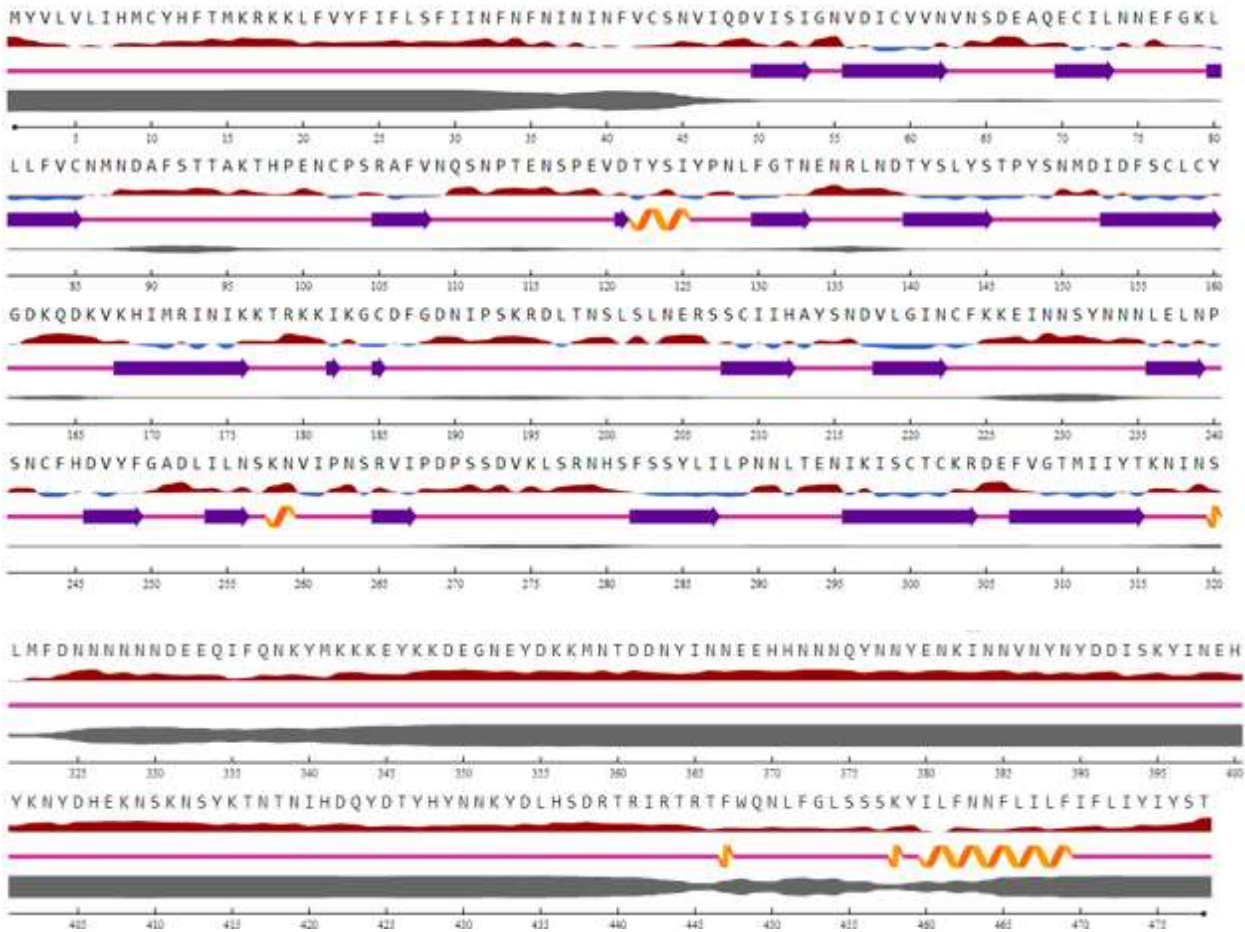

SPECT2

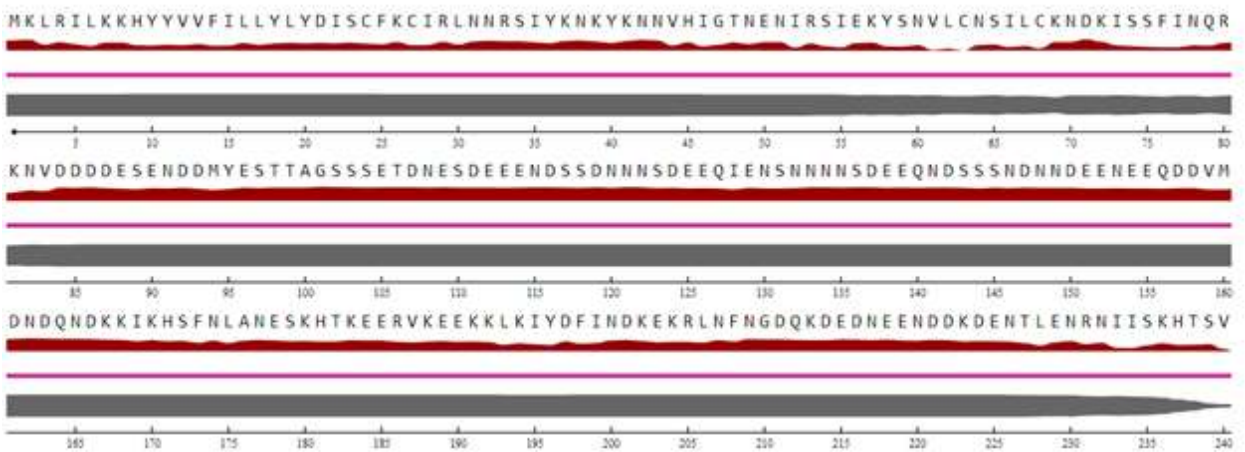



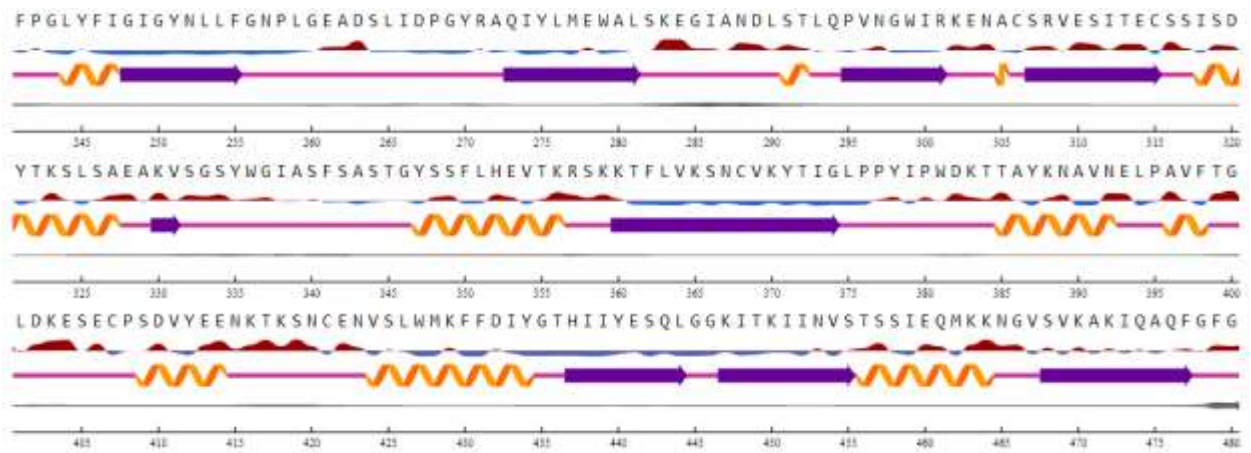

### UIS3

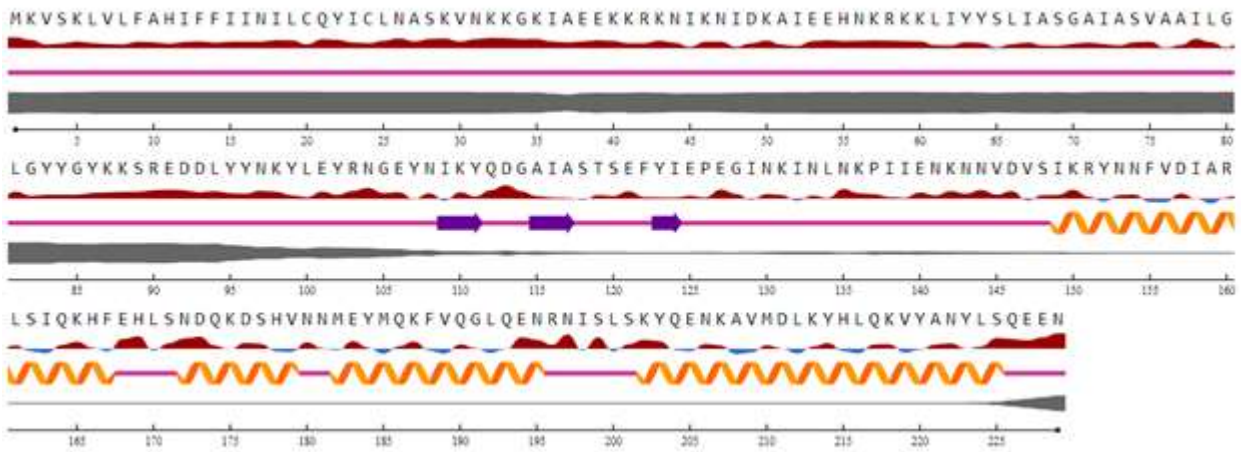

### UIS4

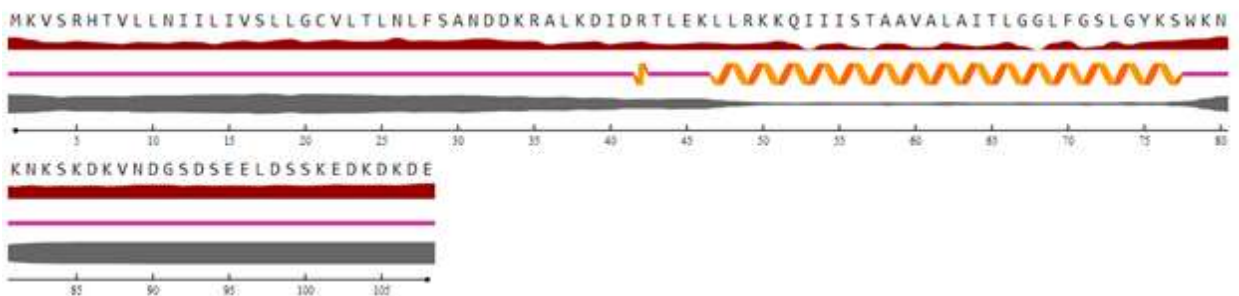

P36

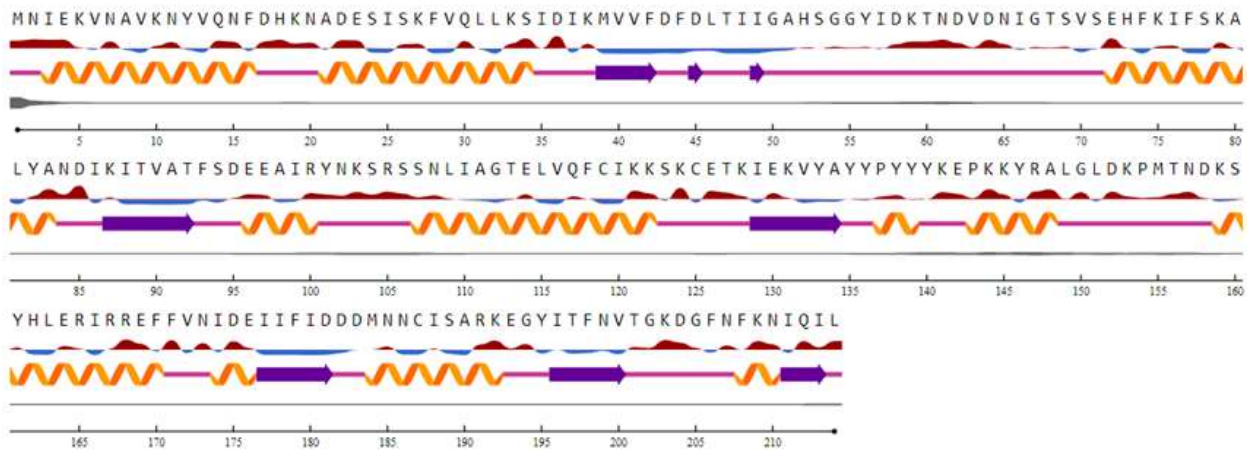

CELTOS

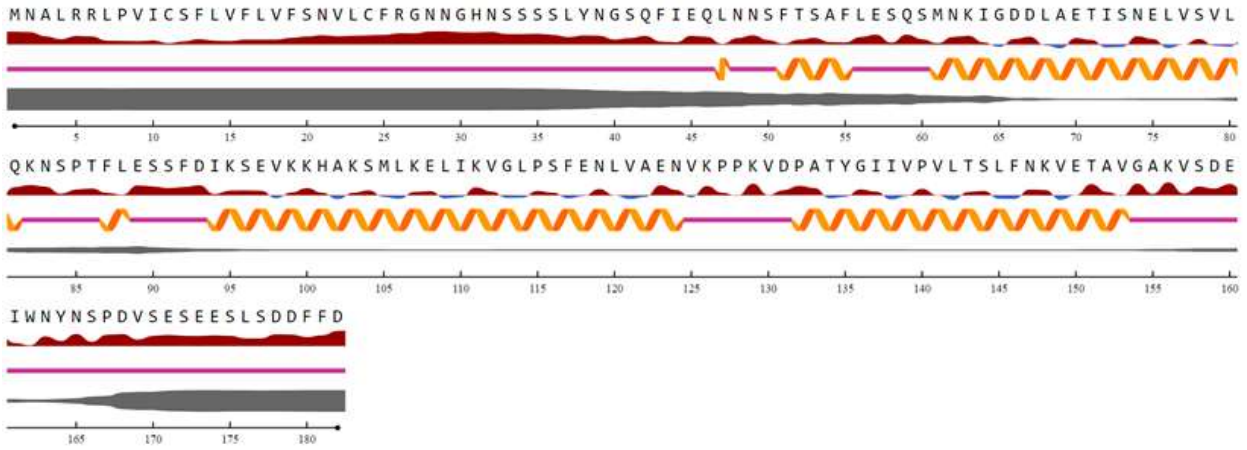



SAP 1

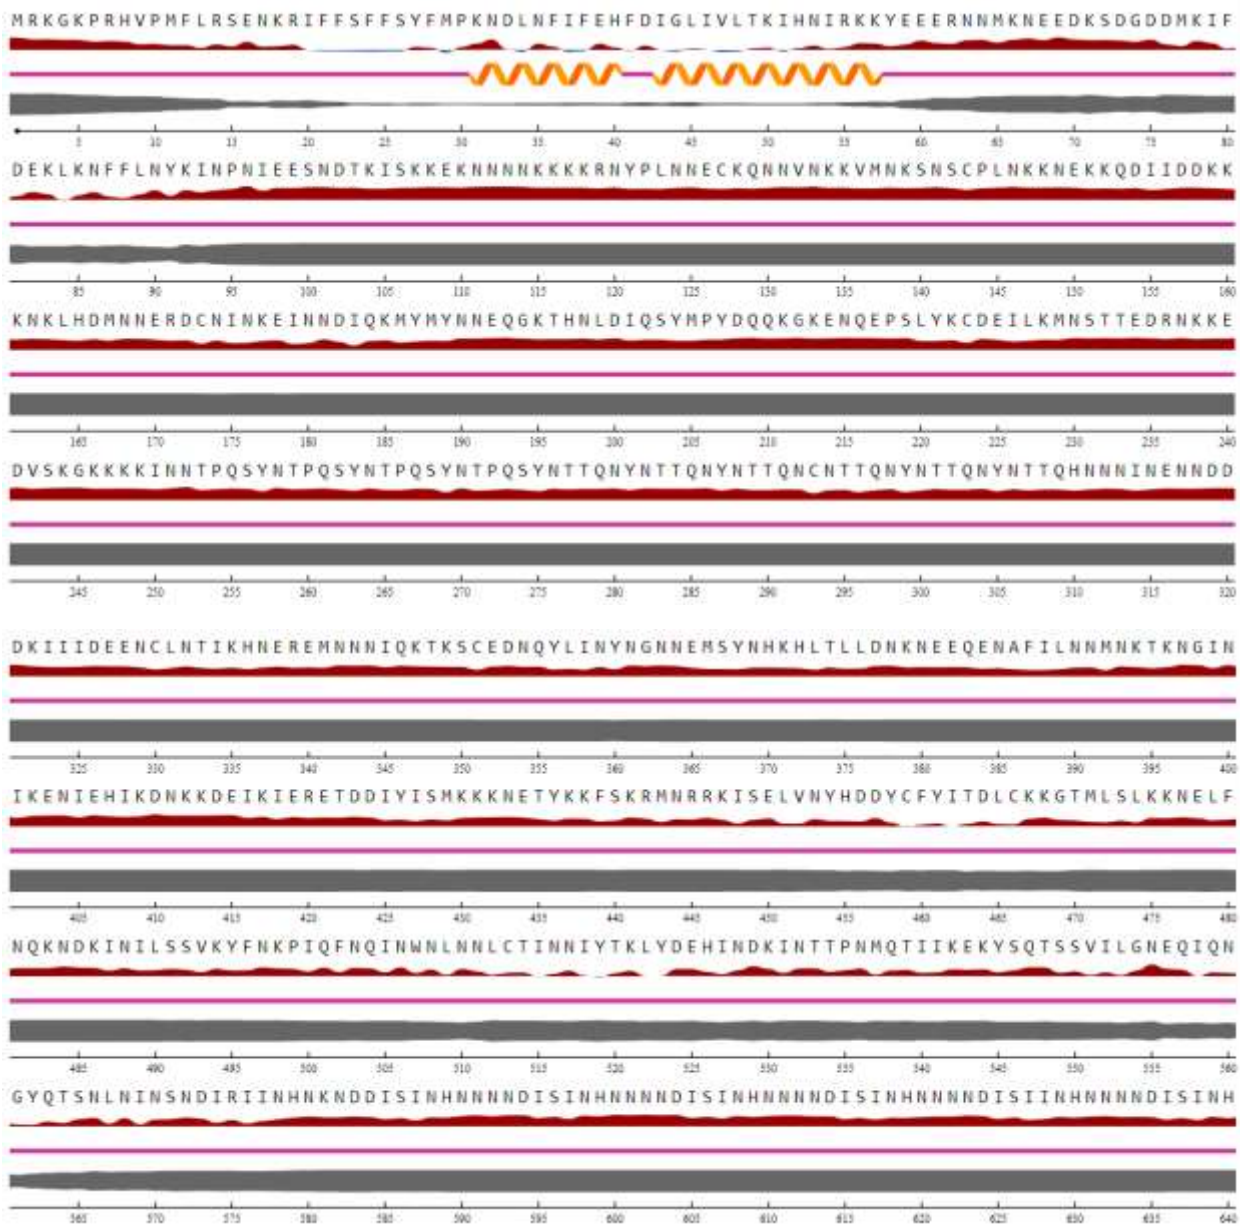

NNNNNNYYFMNNYMHNNIINNYYCYMMNNTNHVNNYYNNIYIQNNHDQNNAPILQPINNHHLAHINDLCYIHSEKNEYTKI

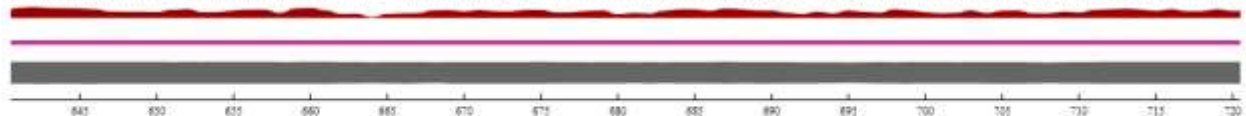

SKNHQNNINPQQSNGKNQNDISNNINKNDEYYNLNEQKILCDKNKSYIKCDIPQKCDNTQDDENSEQNQNYITNPSNGH

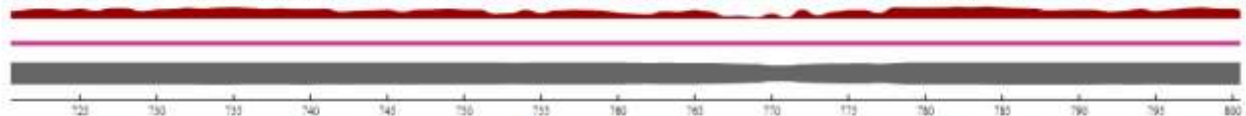

YKIKEQMNYVQHIPDYEHDNTTNEHINTQNYTNINLDPYIMNNQNDNNVYLNQNYFDTEKKNKEEDINITEANTHYNNVH

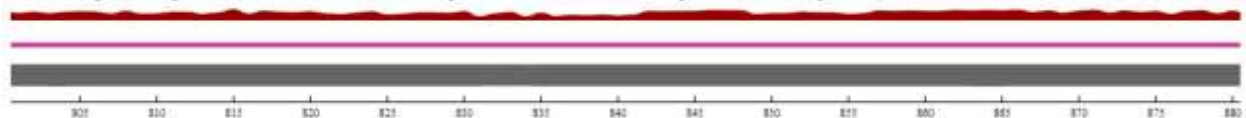

IYQNNSNHMKHINLNNNTNSKSTQDYDLYHNNMENFNNTNYNIMKEKIHINDOTSSVINNSSINSQNNLCNNKKTNDY

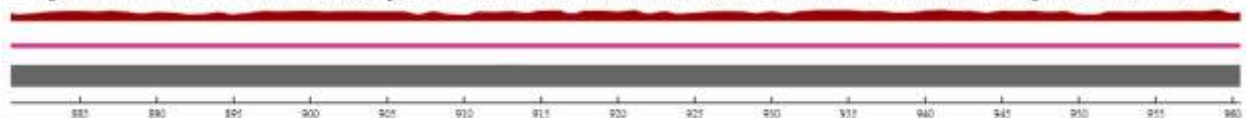

QNRNIKNDNSIPDSSINMNELKNNIQMNDYYASHIYNNNNNNNNNNFIISNNHISNYNNYMNESNVYPQINSNNYIPYID

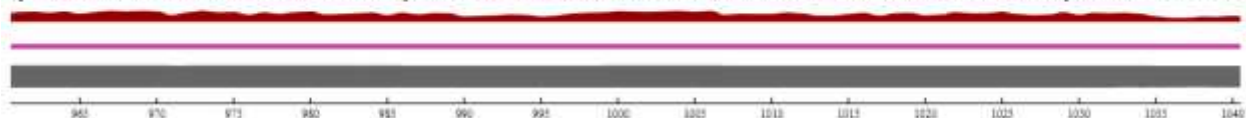

PHLNNPEYKHTINNQLNKNCINNINISMDDNVYDSHTISIHISVNDNEYNNNSHFTNDMYNNNNNNNNNNNNCNSNSSNSN

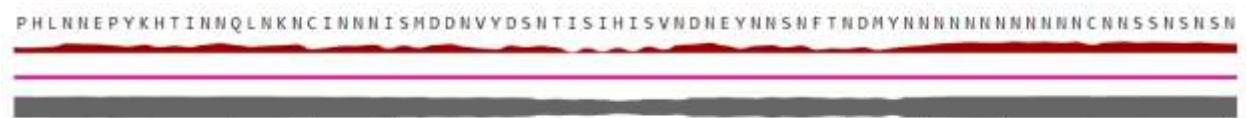

SNQVCLYMPNHELYNSNYNITQHMPSSNDVPKIQKHIANNIIMNGHKEEHIEKKSKEETNKTNEQVYRSINQNNTLILK

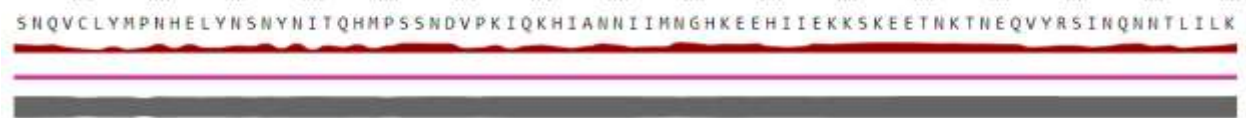

ENEIDENDINTLNQNLNIKNDMMNMDHIINLKNLNNINNIYTPYQNNILKNNEIQFLNNNKEVITKHAYTHSSNEININV

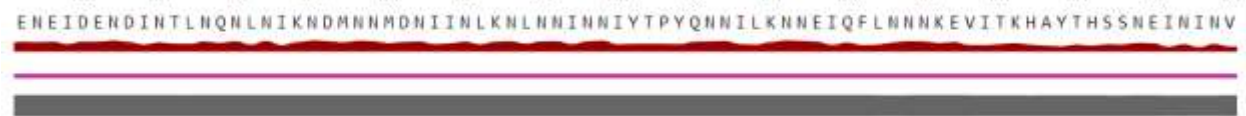

YKNIDTQINIRKNENNNNDIINKKEQKDISTNNEQNQTYNYITSSVKNEYSILDNSPTDKNYKKNLNLNLISSSYNTNDHIN

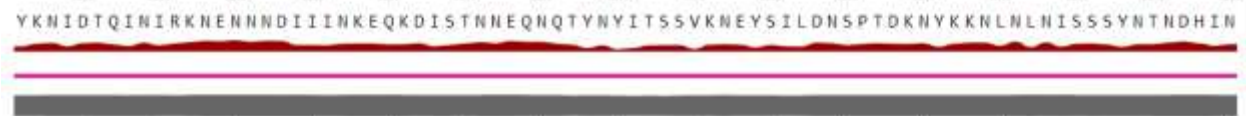

NYHDDIDKTNKDNKYEEEEKHKDINIYINNINSNGKNKNNFINSYFDLNEHEKKKKINIFYHDNKS LKNISNEELTNTNPY

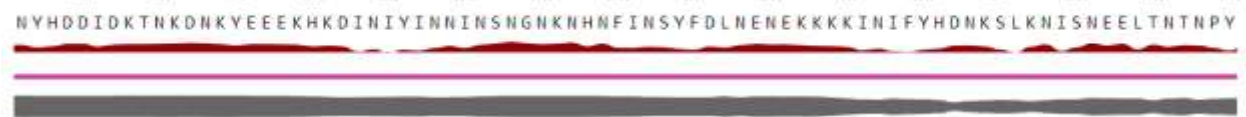

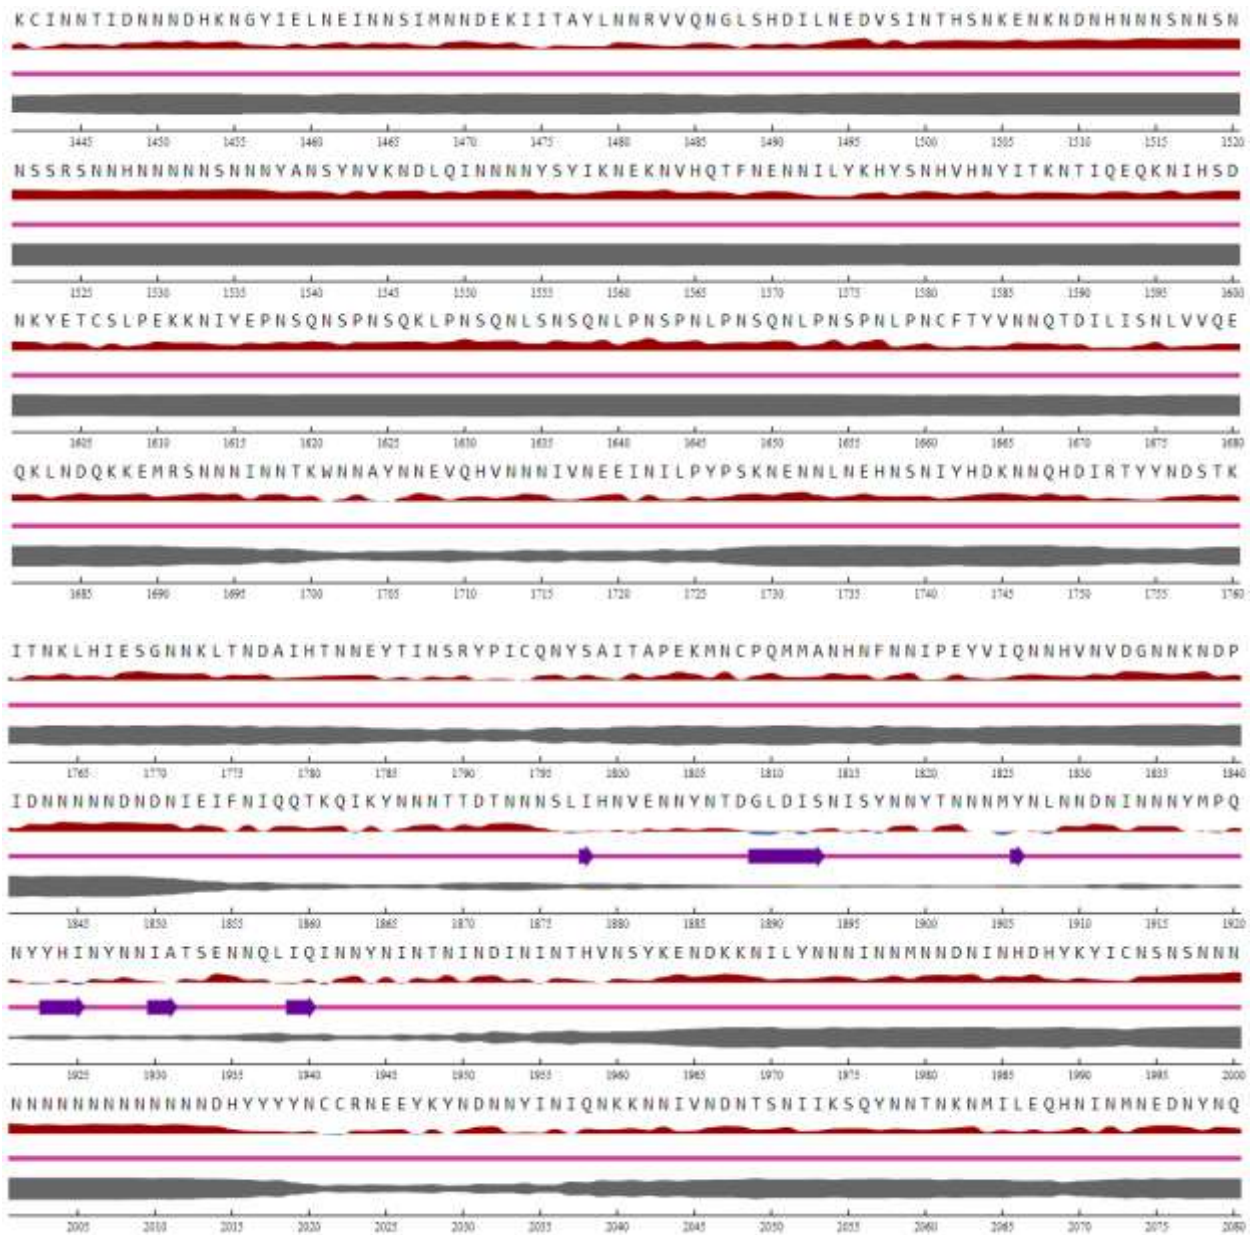

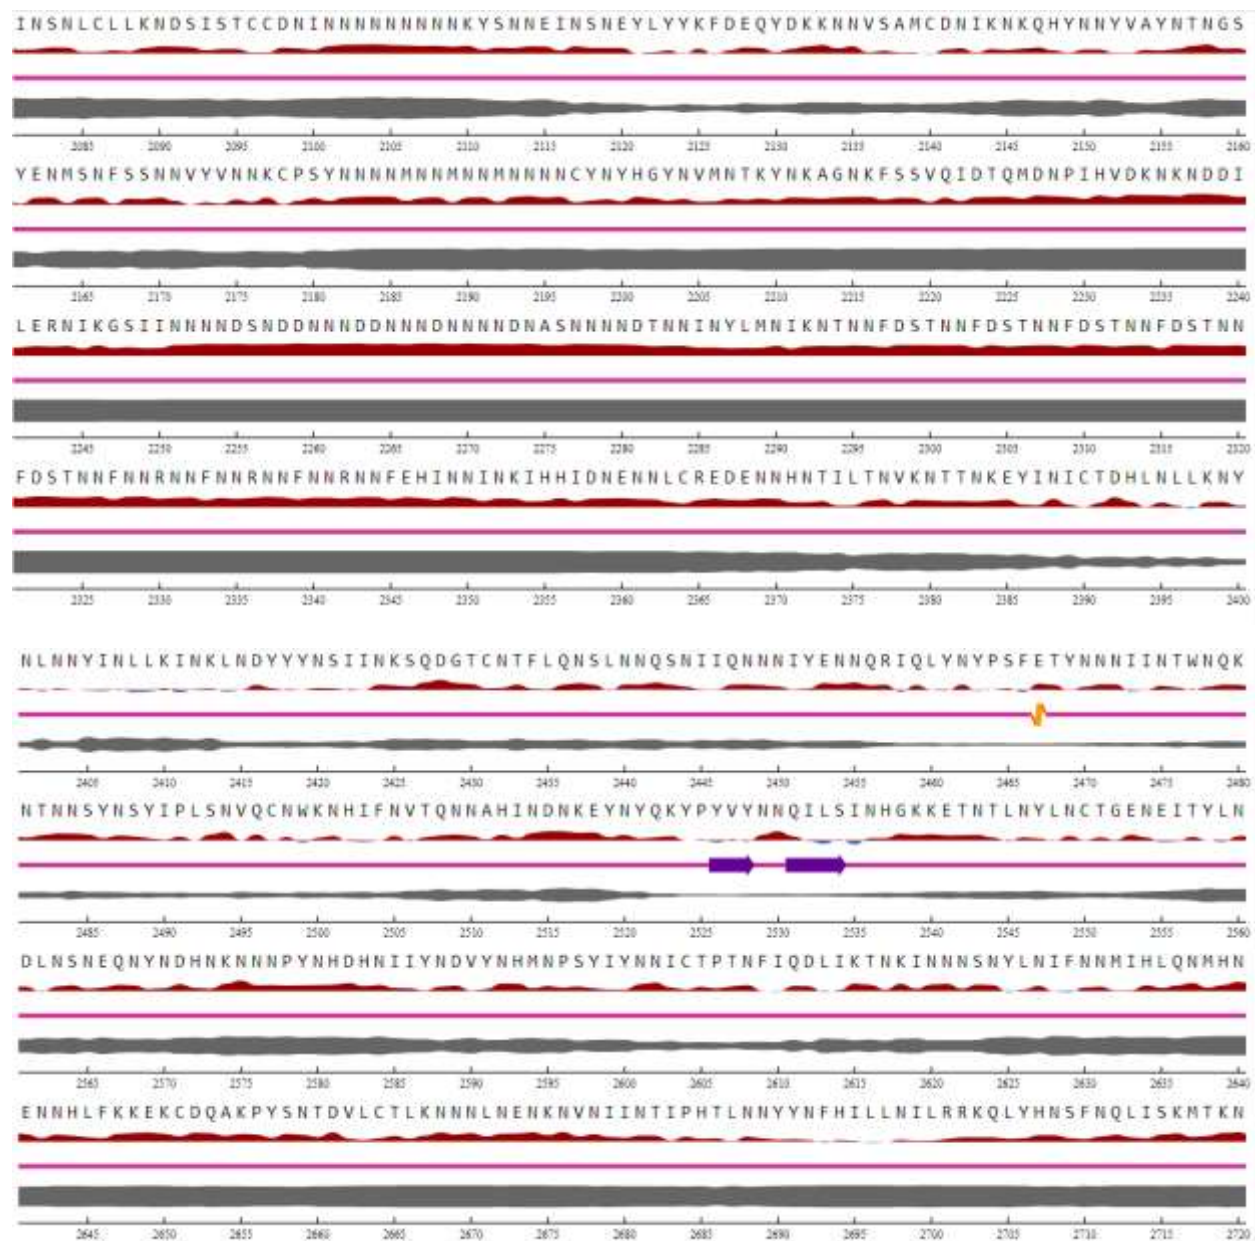



**Supplemental Figure S3.** Predicted 3D structure of malaria vaccine candidates. Hypothetical protein-ligand binding sites are shown in light purple.

**CSP**

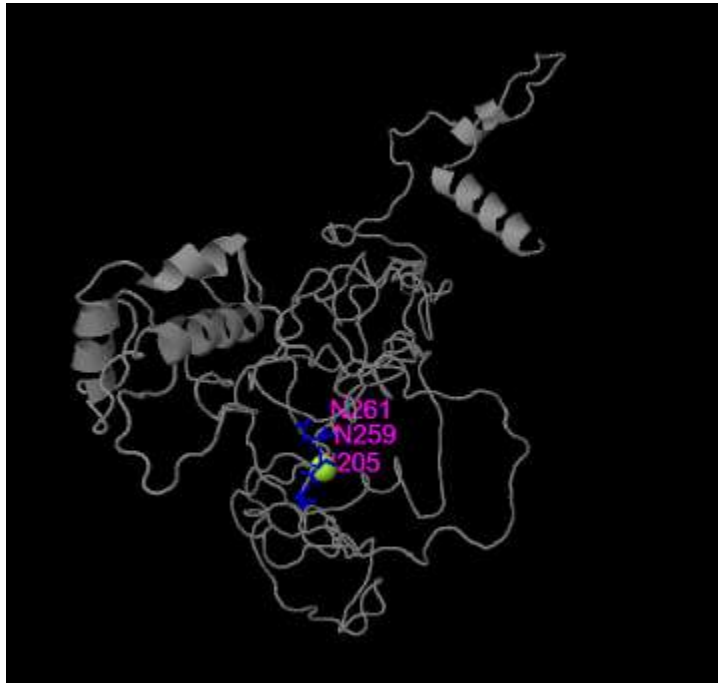

**LSA1**

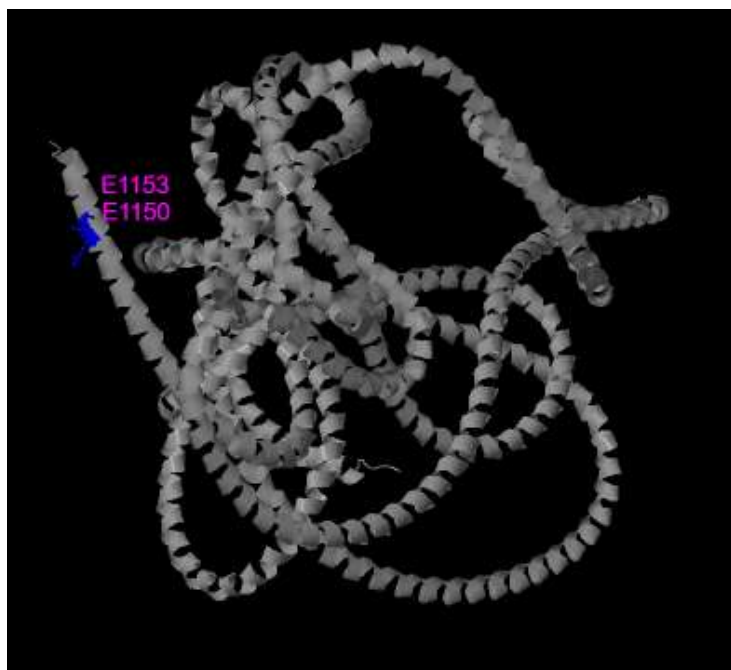

LSA3

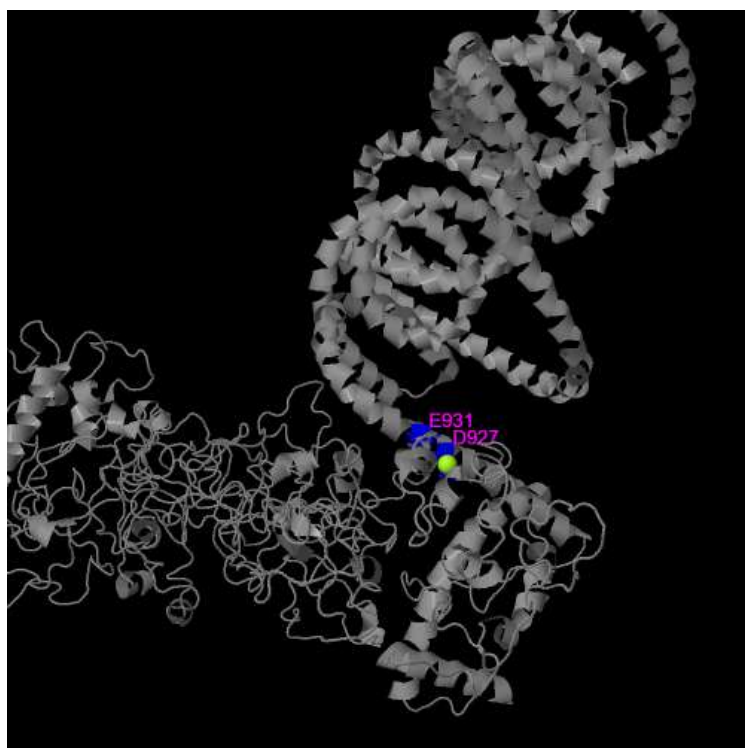

SPECT2



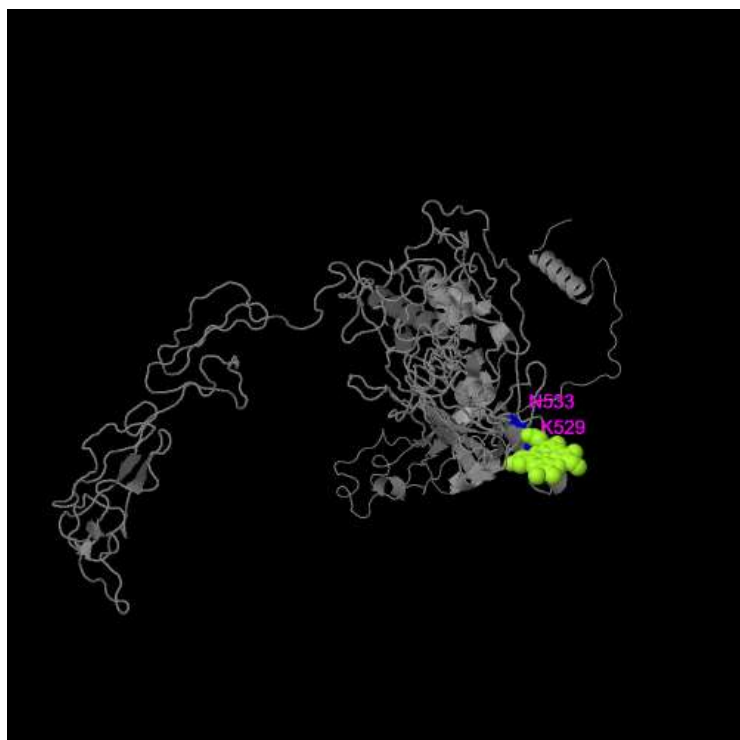

P52

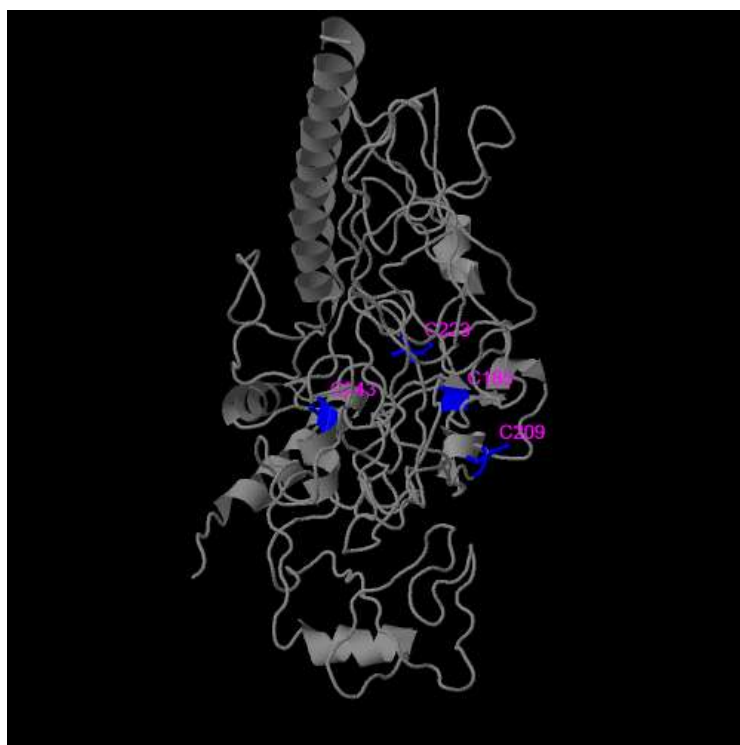

UIS3

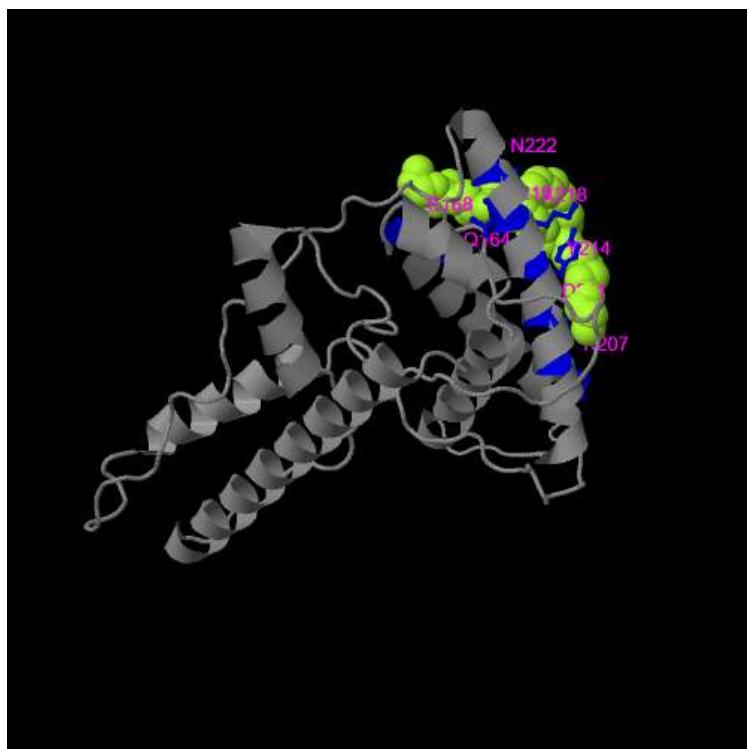

UIS4

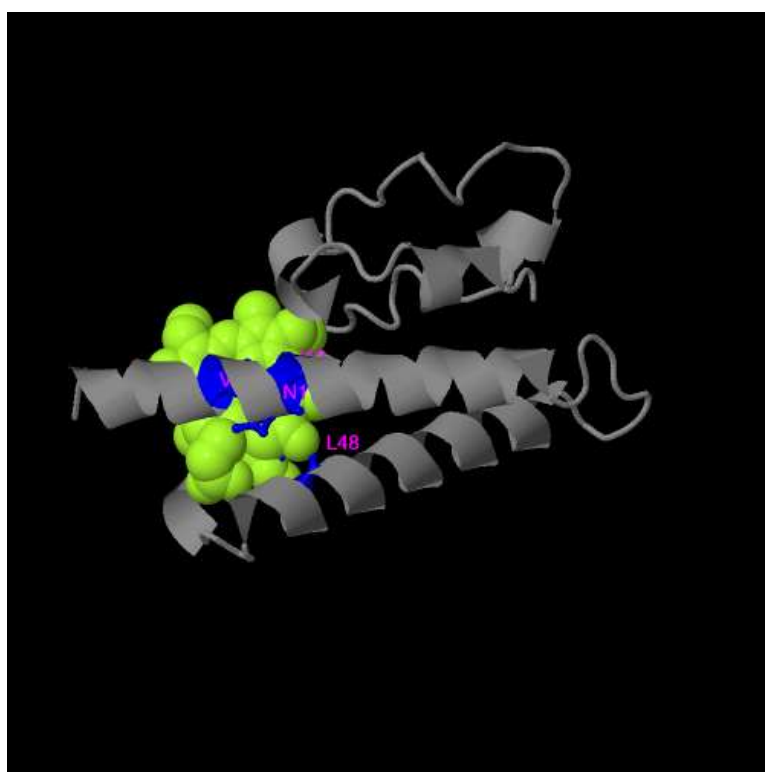

P36

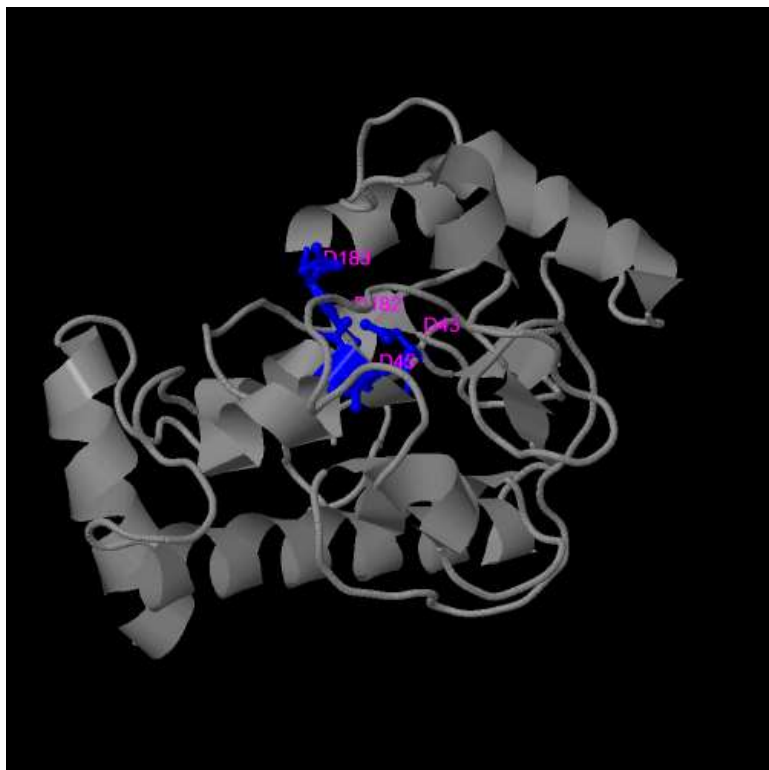

CELTOS

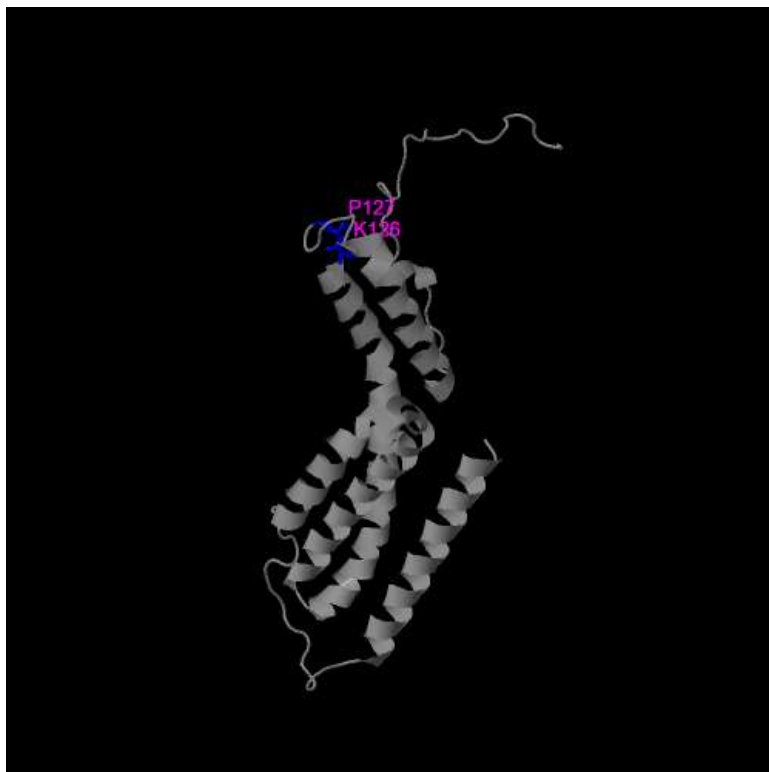

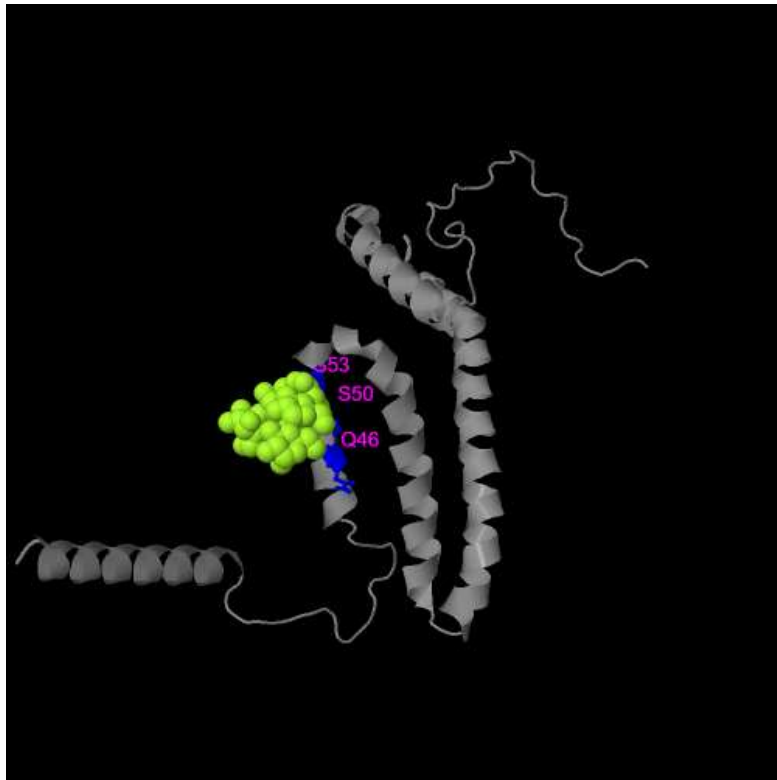

Three fragments of SAP1

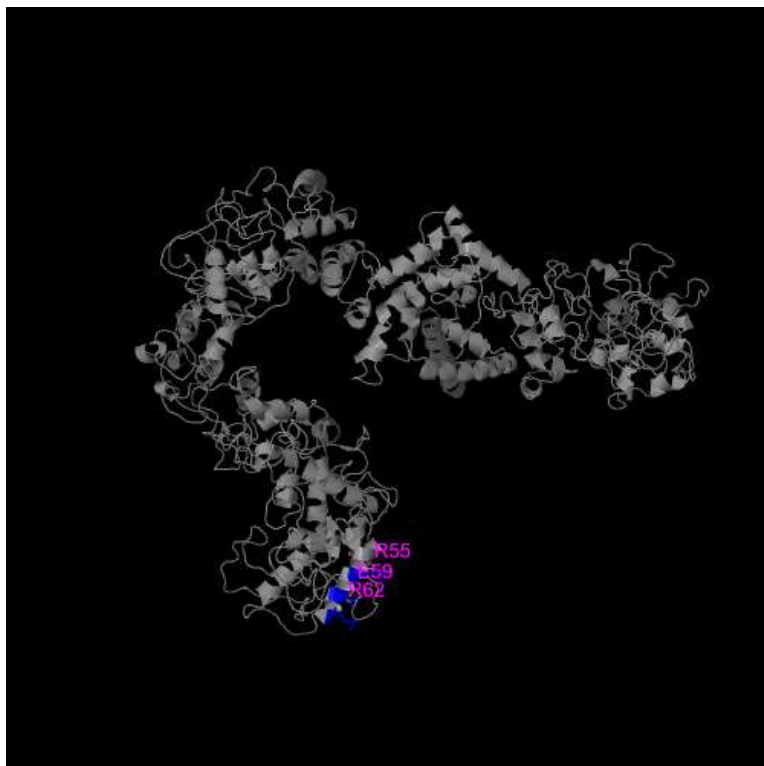

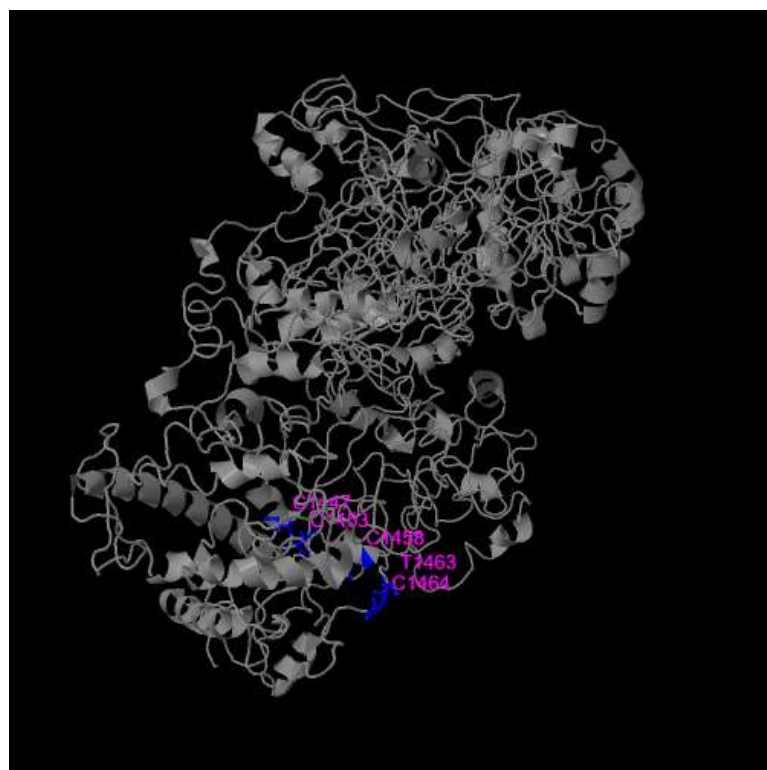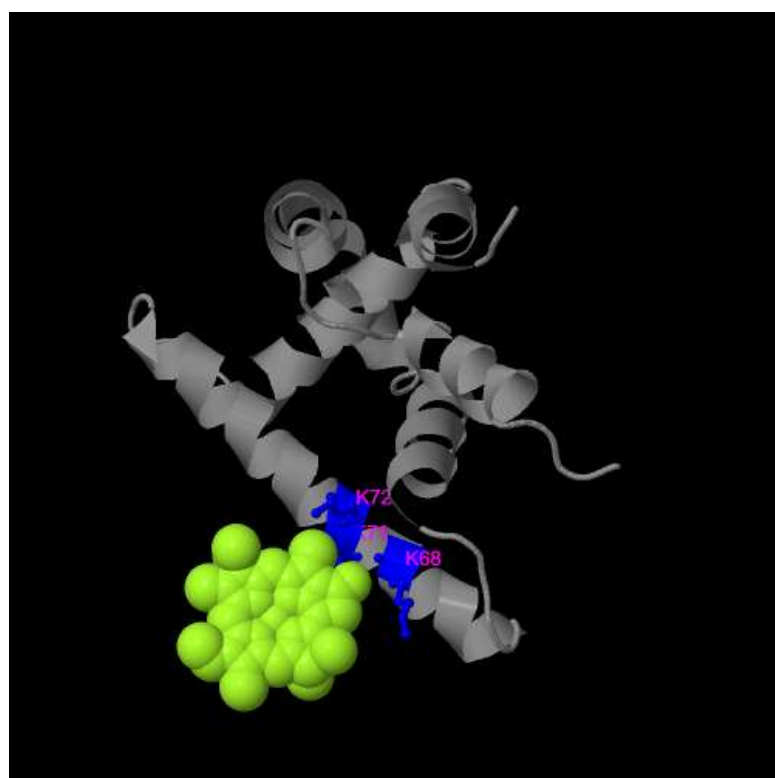

## B. Tables

**Supplemental Table S1.** List of antigens selected and their putative function.

| Antigen | Antigen Full name                                           | Gene ID       | Putative evidence                                 | Reference |
|---------|-------------------------------------------------------------|---------------|---------------------------------------------------|-----------|
| CELTOS  | Cell-traversal protein for ookinetes and sporozoites        | PF3D7_1216600 | Associated with protection from clinical malaria  | 21        |
| CSP     | Circumsporozoite protein                                    | PF3D7_0304600 | Associated with protection from clinical malaria. | 22        |
| LSA1    | Liver stage antigen 1                                       | PF3D7_1036400 | Associated with protection from clinical malaria. | 23        |
| LSA3    | Liver stage antigen 3                                       | PF3D7_0220000 | Associated with protection from clinical malaria. | 24        |
| P36     | 6-cysteine protein (P36)                                    | PF3D7_0404400 | Gene knockout prevents parasite egress from liver | 25        |
| P52     | 6-cysteine protein (P52)                                    | PF3D7_0404500 | Gene knockout prevents parasite egress from liver | 26        |
| UIS3    | Upregulated in infectious sporozoite                        | PF3D7_1302200 | Gene knockout prevents parasite egress from liver | 27        |
| UIS4    | Early transcribed membrane protein                          | PF3D7_1016900 | Gene knockout prevents parasite egress from liver | 28        |
| SAP1    | Sporozoite and liver stage asparagine-rich protein          |               | Gene knockout abolish liver stage                 | 29        |
| SPECT2  | sporozoite microneme protein essential for cell transversal | PF3D7_1147000 | Essential for cell transversal                    |           |
|         |                                                             | PF3D7_040870  |                                                   | 30        |



**Supplemental Table S2.** Samples origin .

| Continent     | Country          | Number of Sequences | <i>P. falciparum</i> endemicity | Collection year  |
|---------------|------------------|---------------------|---------------------------------|------------------|
| Africa        | Burkina Faso     | 56                  | High                            | 2008             |
|               | Cameroon         | 130                 | High                            | 2013             |
|               | Guinea           | 123                 | High                            | 2011             |
|               | Kenya            | 57                  | High                            | 2007             |
|               | Malawi           | 150                 | High                            | 2007-08, 2014-16 |
|               | Mali             | 99                  | High                            | 2002, 2010       |
|               | Tanzania         | 68                  | High                            | 2010, 2013       |
| Asia          | Cambodia         | 129                 | High                            | 2009-11          |
|               | Myanmar          | 18                  | Low                             | 2013             |
|               | Thailand         | 36                  | Low                             | 2013-14          |
| Oceania       | Papua New Guinea | 59                  | Low                             | 2008-10          |
| South America | Brazil           | 22                  | Low                             | 2016             |
|               | Colombia         | 16                  | Low                             | 2011             |
|               | French Guiana    | 36                  | Low                             | 2009-2013        |
|               | Peru             | 11                  | Low                             | 2011             |

**Supplemental Table S3. FST values of the malaria vaccine candidates by continents.** Continents are in columns and each Excel sheet represent a different malaria vaccine candidate.

**Supplemental Table S4. FST values of the malaria vaccine candidates by countries.** Countries are in columns and each Excel sheet represent a different malaria vaccine candidate.

**Supplemental Table S5. Haplotypes distribution by country.** Prevalence of ten of the most frequent haplotypes of each of the studied malaria vaccine candidate by country. Each column represents a country and haplotypes, and their respective frequencies are in row. Each Excel sheet represents a different malaria vaccine candidate.

**Supplement Table S6.** Putative, strong binding CD4+ and CD8+ T-cell epitopes in malaria vaccine candidates.

| Antigen | Strong binding CD4+ epitope                                                                                                  | Strong binding CD8+ epitope                                                                                        | Number of strong and medium binders | Average number of epitopes per 100 amino acid residues (AA) (Protein length, in AA) |
|---------|------------------------------------------------------------------------------------------------------------------------------|--------------------------------------------------------------------------------------------------------------------|-------------------------------------|-------------------------------------------------------------------------------------|
| CeTOS   |                                                                                                                              |                                                                                                                    |                                     |                                                                                     |
|         | MNALRRLPVICS                                                                                                                 | LPVICSFLVF                                                                                                         | 9                                   | 4.9 (182)                                                                           |
| CSP     |                                                                                                                              |                                                                                                                    |                                     |                                                                                     |
|         | KLAILSVSSFLF<br>LAILSVSSFLFV<br>ENWYSLKKNSRS                                                                                 | SSFLFVEALF*                                                                                                        | 10                                  | 2.5 (397)                                                                           |
| LSA1    |                                                                                                                              |                                                                                                                    |                                     |                                                                                     |
|         | TNFKSLLRNLGV<br>NFKSLLRNLGVS<br>QTNFKSLLRNLG<br>FKSLLRNLGVSE<br>NFKSLLRNLGVS<br>TNFKSLLRNLGV<br>ISFYFILVNLLI<br>SFYFILVNLLIF | KFIKSLFHIF*                                                                                                        | 16                                  | 1.4 (1162)                                                                          |
| LSA3    |                                                                                                                              |                                                                                                                    |                                     |                                                                                     |
|         | None                                                                                                                         | ASYVVGFFTF*<br>SYVVGFFTFS*<br>PFYSFVFDIF*<br>KVKNFVKKYK<br>KVDKNNKVPK*<br>KTRKKAQRPK*<br>KVFAAPFISA*<br>KINKYFFLIK | 25                                  | 1.6 (1558)                                                                          |
| P36     |                                                                                                                              |                                                                                                                    |                                     |                                                                                     |
|         | IRYNKSRSSNLI<br>AIRYNKSRSSNL<br>KFVQLLSIDIK<br>RYNKSRSSNLIA<br>FVQLLSIDIKM<br>AIRYNKSRSSNL<br>EAIRYNKSRSSN<br>EEAIRYNKSRSS   | KSKCETKIEK                                                                                                         | 20                                  | 5.3 (379)                                                                           |

|         | IRYNKSRSSNLI<br>SKFVQLLSIDI                                                                                                                                                                                                     |                                                                                                                                                        |                                              |                                                                                              |
|---------|---------------------------------------------------------------------------------------------------------------------------------------------------------------------------------------------------------------------------------|--------------------------------------------------------------------------------------------------------------------------------------------------------|----------------------------------------------|----------------------------------------------------------------------------------------------|
| P52     | MCYHFTMKRKKL<br>HMCYHFTMKRK<br>K<br>NLFGLSSSKYIL<br>QNLFGLSSSKYI<br>NININFVCSNVI<br>ININFVCSNVIQ<br>CYHFTMKRKKLF<br>YHFTMKRKKLFV<br>LFGLSSSKYILF<br>GTMIIYTKNINS<br>MIIYTKNINSLM<br>TMIIYTKNINSL<br>VGTMIYTKNIN<br>FGLSSSKYILFN | KYILFNNFLI<br><br>ILFNNFLILF*<br>VYFIFLSFII*<br>KVKHIMRINI<br>RTRTFWQNLF<br>KLSRNHSFSS<br>NPSNCFHDVY<br>NPSNCFHDVY<br>NPSNCFHDVY<br>NPSNCFHDVY         | 39                                           | 8.15 (478)                                                                                   |
| Antigen | Strong binder<br>CD4+<br>epitope                                                                                                                                                                                                | Strong binder<br>CD8+<br>epitope                                                                                                                       | Number of<br>Strong and<br>medium<br>binders | Average number of<br>epitopes per 100 amino<br>acid residues (AA)<br>(Protein length, in AA) |
| SAP1    | None                                                                                                                                                                                                                            | VKYFNKPIQF<br>YKYIQNIILF<br>YFMPKNDLNF<br>KYIQNIILFL<br>NYMPQNYHHI<br>RIFFSFFSYF<br>RFKLTCNFKF<br>KLKNFFLNYK<br>YTRAVWLLKK<br>MPKNDLNFIF<br>MPQNYHHINY | 43                                           | 1.5 (2940)                                                                                   |
| SPECT2  | KLRILKKHYYVV*<br>LRILKKHYYVVF*<br>MKLRILKKHYYV*<br>MKLRILKKHYYV*<br>KLRILKKHYYVV*<br>LRILKKHYYVVF*                                                                                                                              | LYFIGIGYNL<br>IYVLCVDTTI<br>KRSKKTFLVK<br>KVVMFGFSLK<br>RSKKTFLVKS<br>KKIKHSFNLA<br>YIPWDKTTAY                                                         | 34                                           | 4 (842)                                                                                      |
| UIS3    | KYHLQKVYANYL<br>*<br>YHLQKVYANYLS*                                                                                                                                                                                              |                                                                                                                                                        |                                              |                                                                                              |

|      |                       |      |   |           |
|------|-----------------------|------|---|-----------|
|      | MEYMQKFVQGL           |      |   |           |
|      | Q*                    |      |   |           |
|      | NMEYMQKFVQG           |      |   |           |
|      | L*                    |      |   |           |
|      | <u>NNMEYMQKFVQ</u>    | None | 9 | 3.9 (229) |
|      | <u>G*</u>             |      |   |           |
|      | <u>VNNMEYMQKFV</u>    |      |   |           |
|      | <u>Q*</u>             |      |   |           |
|      | <u>LIYYSLIASGAI*</u>  |      |   |           |
|      | <u>IYYSLIASGAIA*</u>  |      |   |           |
| UIS4 |                       |      |   |           |
|      | <u>KQIIISTA AVAL*</u> |      |   |           |
|      | <u>QIIISTA AVALA*</u> |      |   |           |
|      | <u>RTLEKLLRKKQI*</u>  | None | 4 |           |
|      | <u>DRTLEKLLRKKQ</u>   |      |   | 3.7 (108) |
|      | <u>LEKLLRKKQII*</u>   |      |   |           |

Bold: Mutated AA residue relative to 3D7 allele.

\* Have a mutation

Underline: Mutations likely influence peptide function
